# Supplementary material for: Characterization and Whole Genome Analysis of Human Papillomavirus Type 16 E1-1374∧63nt Variants
Source: PLoS One. 2012 Jul 24;7(7):e41045. doi: 10.1371/journal.pone.0041045 (PMC3404080; doi:10.1371/journal.pone.0041045)
Supplement: Table S1 — Sequencing findings of the samples with unusual melting curves and the effect of specific variations on the 151 amino acid form of the E6 protein. (XLS) [file pone.0041045.s002.xls]

## Sheet: Suplemental table
Supplemental Table S1. Results of sequencing samples with unusual melting curves and the effects of mutations on the 151 Amino acid form of E6 protein
	DNA Sequence of E6 ORF a
Reference and samples	91	93	94	98	103	109	110	131	132	142	143	145	154	159	166	173	176	178	182	217	245	246	256	267	268	286	289	302	303	310	315	319	335	350	351	352	375	400	403	411	412	432	433	434	449	453	466	473	502
HPV16R	A	A	G	A	A	T	C	A	G	A	C	G	A	T	A	C	G	T	A	G	C	G	C	G	A	T	A	T	T	T	C	A	C	T	T	G	A	G	A	G	T	T	G	T	C	G	A	A	C
GE								G																										G
EA																		G
Af1									C		G	T														A	G						T
Af2						C			T		G	T														A	G						T						G
AA												T														A	G						T	G									A
1A1						C																												G
1E1																				A														G
1G1								G																										G
1E3			A																															G
1E2						C																												G
1C4																														G				G
1B4 c																													*
1A5																							T											G
1A8						C																												G
1C9												T														A	G						T	G
1E9																							T											G
1G9												T														A	G						T	G
1B10						C																												G
2A2																T																			C
2D3								G																										G
2B4																			C															G
2H4								G
2E5																																		G							C
2G5																																						A
2E6						C																												G
2E8					G
2A9																							T											G
2E9																									G
2G9																																		G
2D10					G
2H10	T																																	G								C
2A12																	C																	G
2D12	T																																	G
3D1																															G			G
3G1																			C															G
3F2																							T											G
3B3																																		G														C
3F3		T										T														A	G						T	G
3A4												T														A	G						T	G
3D5						C																												G
3G7						C																												G
3E9																							T											G
3H9																							T											G
3B10						C																												G
3E10																						T												G
4C2																																		G							C
4E2												T														A	G						T	G
4G2																	A																	G
4H4												T														A	G						T	G
4B5																							T											G
4C6																																		G
4H6									C		G	T														A	G						T
4A7													G																					G
4F7													W																			R		G
4A8						C																												G
4G8						C																												G
4H8						C																												G
4D9																T
4E9						C																												G
4H9																T
4E10										G																								G
4D11						C																												G
4F11						C																												G
4G11						C																												G
5C1																							T											G												K
5E1						C																												G
5G2						C																												G
5C3						C																												G
5E3						C																												G
5F3										G																								G
5F4								G																										G
5G5																																															R
5F7						C																												G
5G8								G																										G
5E9						C																												G
5G9																							T											G
5A10														Y
5G11								G																										G
5E12					G
6E2												T														A	G						T	G
6F2												T														A	G						T	G
6A3																								R
6C6																																		G							C
6F6					G
6G6																							T											G
6B9				C
6G11						C																												G
6H11								G																										G
6G12													G								T													G
7D1										G																								G
7F4																																				A
7A5										G																								G
7C5																																		G											G
7G5												T														A	G						T	G
7C6																																		G
7E6						C																												G
7D8																							T											G															Y
7E8						C																												G
7H8						C																												G
7B9							G					T														A	G						T	G
7E9																																		G						R
7H9
7B10																			C															G
7C10												T														A	G						T	G
7H10										G																								G
7A11																																		G											G
7E11						C																												G
7G11													G																					G
7C12						C																												G
7D12						C																												G
7G12						C																												G
8G2																																		K
8H4																							T											G
8A5																																		G										Y
8G5 d
8H5									C		G	T														A	G						T
8A6									C		G	T														A	G						T
8E6						C			T		G	T														A	G						T						G
8H7						C																												G
8H9												T														A	G						T	G
8D12																																					R
8F12						C																												G
14																																							G
24						C																												G
25																												G						G
41																																		G
54												T														A	G						T	G
55																							T											G
61						C																												G
75					G
76						C									G																			G
a W= T/A; Y=C/T; K=G/T; R=G/A
b variant names according to the recently proposed nomenclature [15]
c deletion of T at position 303 with an additional E-r sequence as well
d deletion from nt 263 to nt 495 with an additional E-r sequence as well
[truncated: 34 more columns]
